# Supplementary material
Source: publisher figshare collection journal article supplement (https://acs.figshare.com/ndownloader/files/3810469)
Supplement: Supplementary file 1 [file 3810469]

####################################################################### 
# 
# This file contains crystal structure data downloaded from the 
# Cambridge Structural Database (CSD) hosted by the Cambridge 
# Crystallographic Data Centre (CCDC).
# 
# Full information about CCDC data access policies and citation 
# guidelines are available at http://www.ccdc.cam.ac.uk/access/V1 
# 
# Audit and citation data items may have been added by the CCDC. 
# Please retain this information to preserve the provenance of 
# this file and to allow appropriate attribution of the data. 
# 
#######################################################################

data_k1421
_audit_block_doi                 10.5517/cc13pt4r
_database_code_depnum_ccdc_archive 'CCDC 1033854'
_audit_update_record             
;
2014-11-12 deposited with the CCDC.
2015-01-06 downloaded from the CCDC.
;

_audit_creation_method           SHELXL-97
_chemical_name_systematic        
; 
 ? 
;
_chemical_name_common            KC-CN-anti-26
_chemical_melting_point          412-413
_chemical_formula_sum            'C44 H54 N2 O10'
_chemical_formula_weight         770.89

loop_
_atom_type_symbol
_atom_type_description
_atom_type_scat_dispersion_real
_atom_type_scat_dispersion_imag
_atom_type_scat_source
C C 0.0181 0.0091 'International Tables Vol C Tables 4.2.6.8 and 6.1.1.4'
H H 0.0000 0.0000 'International Tables Vol C Tables 4.2.6.8 and 6.1.1.4'
N N 0.0311 0.0180 'International Tables Vol C Tables 4.2.6.8 and 6.1.1.4'
O O 0.0492 0.0322 'International Tables Vol C Tables 4.2.6.8 and 6.1.1.4'

_symmetry_cell_setting           Monoclinic
_symmetry_space_group_name_H-M   P2(1)/c

loop_
_symmetry_equiv_pos_as_xyz
'x, y, z'
'-x, y+1/2, -z+1/2'
'-x, -y, -z'
'x, -y-1/2, z-1/2'

_cell_length_a                   23.1573(13)
_cell_length_b                   8.7306(6)
_cell_length_c                   10.1458(7)
_cell_angle_alpha                90.00
_cell_angle_beta                 92.893(4)
_cell_angle_gamma                90.00
_cell_volume                     2048.6(2)
_cell_formula_units_Z            2
_cell_measurement_temperature    123(2)
_cell_measurement_reflns_used    3366
_cell_measurement_theta_min      1.91
_cell_measurement_theta_max      66.70

_exptl_crystal_description       'thin plate'
_exptl_crystal_colour            Colorless
_exptl_crystal_size_max          0.45
_exptl_crystal_size_mid          0.40
_exptl_crystal_size_min          0.05
_exptl_crystal_density_diffrn    1.250
_exptl_crystal_density_method    'not measured'
_exptl_crystal_F_000             824
_exptl_absorpt_coefficient_mu    0.720
_exptl_absorpt_correction_type   Empirical
_exptl_absorpt_correction_T_min  0.5806
_exptl_absorpt_correction_T_max  0.7528
_exptl_absorpt_process_details   'SAINT v7.60A'

_diffrn_ambient_temperature      123(2)
_diffrn_radiation_wavelength     1.54178
_diffrn_radiation_type           CuK\a
_diffrn_radiation_source         'Incoatec 30 Watt Cu microsource'
_diffrn_radiation_monochromator  graphite
_diffrn_measurement_device_type  'Bruker DUO APEX II CCD'
_diffrn_measurement_method       CCD
_diffrn_detector_area_resol_mean 4K
_diffrn_standards_decay_%        0.0
_diffrn_reflns_number            14009
_diffrn_reflns_av_R_equivalents  0.0413
_diffrn_reflns_av_sigmaI/netI    0.0330
_diffrn_reflns_limit_h_min       -27
_diffrn_reflns_limit_h_max       27
_diffrn_reflns_limit_k_min       0
_diffrn_reflns_limit_k_max       9
_diffrn_reflns_limit_l_min       0
_diffrn_reflns_limit_l_max       12
_diffrn_reflns_theta_min         1.91
_diffrn_reflns_theta_max         66.70
_reflns_number_total             3742
_reflns_number_gt                2631
_reflns_threshold_expression     >3.99sigma(I)

_computing_data_collection       'APEX2 v2013.4-1 (Bruker-Nonius, 2013)'
_computing_cell_refinement       'SAINT v7.60A (Bruker-Nonius, 2013)'
_computing_data_reduction        'SAINT v7.60A (Bruker-Nonius, 2013)'
_computing_structure_solution    'SHELXS v6.12 (G.M. Sheldrick, 2001)'
_computing_structure_refinement  'SHELXL v6.12 (G.M. Sheldrick, 2001)'
_computing_molecular_graphics    ?
_computing_publication_material  ?

_refine_special_details          
; 
 Refinement of F^2^ against ALL reflections.  The weighted R-factor wR and 
 goodness of fit S are based on F^2^, conventional R-factors R are based 
 on F, with F set to zero for negative F^2^. The threshold expression of 
 F^2^ > 4sigma(F^2^) is used only for calculating R-factors(gt) etc. and is 
 not relevant to the choice of reflections for refinement.  R-factors based 
 on F^2^ are statistically about twice as large as those based on F, and R- 
 factors based on ALL data will be even larger. 
;

_refine_ls_structure_factor_coef Fsqd
_refine_ls_matrix_type           full
_refine_ls_weighting_scheme      calc
_refine_ls_weighting_details     
'calc w=1/[\s^2^(Fo^2^)+(0.0437P)^2^+1.5539P] where P=(Fo^2^+2Fc^2^)/3'
_atom_sites_solution_primary     direct
_atom_sites_solution_secondary   difmap
_atom_sites_solution_hydrogens   geom
_refine_ls_hydrogen_treatment    noref
_refine_ls_extinction_method     SHELXL
_refine_ls_extinction_coef       0.00072(15)
_refine_ls_extinction_expression Fc^*^=kFc[1+0.001xFc^2^\l^3^/sin(2\q)]^-1/4^
_refine_ls_number_reflns         3486
_refine_ls_number_parameters     255
_refine_ls_number_restraints     0
_refine_ls_R_factor_all          0.0517
_refine_ls_R_factor_gt           0.0387
_refine_ls_wR_factor_ref         0.1145
_refine_ls_wR_factor_gt          0.1031
_refine_ls_goodness_of_fit_ref   1.028
_refine_ls_restrained_S_all      1.028
_refine_ls_shift/su_max          0.001
_refine_ls_shift/su_mean         0.000

loop_
_atom_site_label
_atom_site_type_symbol
_atom_site_fract_x
_atom_site_fract_y
_atom_site_fract_z
_atom_site_U_iso_or_equiv
_atom_site_adp_type
_atom_site_occupancy
_atom_site_symmetry_multiplicity
_atom_site_calc_flag
_atom_site_refinement_flags
_atom_site_disorder_assembly
_atom_site_disorder_group
O1 O 0.26206(5) 0.31521(14) 0.40081(13) 0.0227(3) Uani 1 1 d . . .
O2 O 0.28328(5) 0.05802(14) 0.36439(13) 0.0265(3) Uani 1 1 d . . .
O3 O 0.76226(5) 0.34891(15) 0.77051(13) 0.0268(3) Uani 1 1 d . . .
O4 O 0.84896(5) 0.24934(15) 0.55040(14) 0.0282(3) Uani 1 1 d . . .
O5 O 0.89250(5) 0.46608(15) 0.48879(14) 0.0306(3) Uani 1 1 d . . .
N1 N 1.04993(7) 0.1757(2) 0.61383(18) 0.0326(4) Uani 1 1 d . . .
C1 C 0.21097(7) 0.3740(2) 0.43842(17) 0.0205(4) Uani 1 1 d . . .
C2 C 0.18060(7) 0.2577(2) 0.51173(18) 0.0227(4) Uani 1 1 d . . .
H2 H 0.1427 0.2662 0.5425 0.027 Uiso 1 1 calc R . .
C3 C 0.21546(7) 0.1380(2) 0.52756(18) 0.0239(4) Uani 1 1 d . . .
H3 H 0.2063 0.0477 0.5743 0.029 Uiso 1 1 calc R . .
C4 C 0.27129(7) 0.1636(2) 0.46228(19) 0.0235(4) Uani 1 1 d . . .
C5 C 0.32382(8) 0.1713(2) 0.5579(2) 0.0276(4) Uani 1 1 d . . .
H5A H 0.3276 0.0727 0.6056 0.033 Uiso 1 1 calc R . .
H5B H 0.3175 0.2524 0.6238 0.033 Uiso 1 1 calc R . .
C6 C 0.38027(8) 0.2042(2) 0.4916(2) 0.0314(5) Uani 1 1 d . . .
H6A H 0.3867 0.1235 0.4253 0.038 Uiso 1 1 calc R . .
H6B H 0.3769 0.3034 0.4446 0.038 Uiso 1 1 calc R . .
C7 C 0.43221(8) 0.2099(3) 0.5898(2) 0.0356(5) Uani 1 1 d . . .
H7A H 0.4348 0.1120 0.6388 0.043 Uiso 1 1 calc R . .
H7B H 0.4263 0.2928 0.6544 0.043 Uiso 1 1 calc R . .
C8 C 0.48881(8) 0.2376(3) 0.5235(2) 0.0353(5) Uani 1 1 d . . .
H8A H 0.4947 0.1537 0.4600 0.042 Uiso 1 1 calc R . .
H8B H 0.4856 0.3344 0.4728 0.042 Uiso 1 1 calc R . .
C9 C 0.54155(8) 0.2471(3) 0.6187(2) 0.0368(5) Uani 1 1 d . . .
H9A H 0.5452 0.1500 0.6689 0.044 Uiso 1 1 calc R . .
H9B H 0.5358 0.3307 0.6826 0.044 Uiso 1 1 calc R . .
C10 C 0.59740(8) 0.2760(2) 0.5494(2) 0.0311(5) Uani 1 1 d . . .
H10A H 0.5924 0.3684 0.4934 0.037 Uiso 1 1 calc R . .
H10B H 0.6046 0.1882 0.4907 0.037 Uiso 1 1 calc R . .
C11 C 0.65019(8) 0.2982(2) 0.6436(2) 0.0282(4) Uani 1 1 d . . .
H11A H 0.6423 0.3808 0.7071 0.034 Uiso 1 1 calc R . .
H11B H 0.6577 0.2027 0.6943 0.034 Uiso 1 1 calc R . .
C12 C 0.70342(7) 0.3395(2) 0.56890(19) 0.0243(4) Uani 1 1 d . . .
H12A H 0.7136 0.2508 0.5139 0.029 Uiso 1 1 calc R . .
H12B H 0.6934 0.4257 0.5086 0.029 Uiso 1 1 calc R . .
C13 C 0.75594(7) 0.3837(2) 0.65476(18) 0.0218(4) Uani 1 1 d . . .
C14 C 0.80088(7) 0.4771(2) 0.58784(18) 0.0210(4) Uani 1 1 d . . .
C15 C 0.85250(7) 0.4029(2) 0.53791(18) 0.0230(4) Uani 1 1 d . . .
C16 C 0.89429(8) 0.1621(2) 0.4891(2) 0.0303(5) Uani 1 1 d . . .
H16A H 0.9052 0.2158 0.4081 0.036 Uiso 1 1 calc R . .
H16B H 0.8789 0.0602 0.4628 0.036 Uiso 1 1 calc R . .
C17 C 1.00031(8) 0.1943(2) 0.5429(2) 0.0272(4) Uani 1 1 d . . .
H17 H 1.0017 0.2481 0.4618 0.033 Uiso 1 1 calc R . .
C18 C 0.94705(8) 0.1412(2) 0.57842(19) 0.0254(4) Uani 1 1 d . . .
C19 C 0.94549(9) 0.0608(2) 0.6967(2) 0.0320(5) Uani 1 1 d . . .
H19 H 0.9101 0.0208 0.7253 0.038 Uiso 1 1 calc R . .
C20 C 0.99624(9) 0.0403(2) 0.7714(2) 0.0346(5) Uani 1 1 d . . .
H20 H 0.9962 -0.0142 0.8525 0.042 Uiso 1 1 calc R . .
C21 C 1.04679(9) 0.0991(2) 0.7279(2) 0.0335(5) Uani 1 1 d . . .
H21A H 1.0813 0.0848 0.7811 0.040 Uiso 1 1 calc R . .
C22 C 0.23531(8) 0.0202(2) 0.2752(2) 0.0299(4) Uani 1 1 d . . .
H22A H 0.2491 -0.0391 0.2010 0.045 Uiso 1 1 calc R . .
H22B H 0.2169 0.1146 0.2420 0.045 Uiso 1 1 calc R . .
H22C H 0.2072 -0.0407 0.3217 0.045 Uiso 1 1 calc R . .

loop_
_atom_site_aniso_label
_atom_site_aniso_U_11
_atom_site_aniso_U_22
_atom_site_aniso_U_33
_atom_site_aniso_U_23
_atom_site_aniso_U_13
_atom_site_aniso_U_12
O1 0.0204(6) 0.0175(7) 0.0309(7) 0.0025(5) 0.0067(5) 0.0019(5)
O2 0.0265(7) 0.0210(7) 0.0324(8) -0.0011(5) 0.0037(5) 0.0023(5)
O3 0.0326(7) 0.0245(7) 0.0236(7) 0.0013(6) 0.0032(5) -0.0010(5)
O4 0.0223(6) 0.0205(7) 0.0421(8) -0.0032(6) 0.0068(6) 0.0028(5)
O5 0.0252(7) 0.0272(8) 0.0403(8) 0.0012(6) 0.0117(6) 0.0007(5)
N1 0.0245(8) 0.0314(10) 0.0423(11) 0.0007(8) 0.0060(7) 0.0026(7)
C1 0.0171(8) 0.0233(10) 0.0212(9) -0.0019(7) 0.0030(7) -0.0001(7)
C2 0.0201(9) 0.0241(10) 0.0242(10) -0.0003(8) 0.0029(7) -0.0031(7)
C3 0.0232(9) 0.0229(10) 0.0257(10) 0.0029(8) 0.0018(7) -0.0044(7)
C4 0.0231(9) 0.0172(10) 0.0307(11) 0.0019(8) 0.0040(8) 0.0008(7)
C5 0.0226(9) 0.0292(11) 0.0310(11) 0.0016(8) 0.0014(8) 0.0004(7)
C6 0.0225(10) 0.0351(12) 0.0369(12) 0.0040(9) 0.0040(8) -0.0007(8)
C7 0.0225(10) 0.0445(13) 0.0399(13) 0.0006(10) 0.0032(9) -0.0021(9)
C8 0.0220(10) 0.0422(13) 0.0420(13) 0.0015(10) 0.0034(9) -0.0025(8)
C9 0.0226(10) 0.0468(13) 0.0413(13) 0.0007(10) 0.0044(9) -0.0030(9)
C10 0.0232(9) 0.0352(12) 0.0353(12) -0.0007(9) 0.0042(8) -0.0027(8)
C11 0.0227(9) 0.0302(11) 0.0320(11) -0.0003(8) 0.0046(8) -0.0021(8)
C12 0.0225(9) 0.0244(10) 0.0263(10) -0.0007(8) 0.0027(7) -0.0017(7)
C13 0.0232(9) 0.0145(9) 0.0278(10) -0.0034(7) 0.0040(7) 0.0035(7)
C14 0.0186(8) 0.0210(10) 0.0236(10) -0.0011(7) 0.0017(7) -0.0007(7)
C15 0.0214(9) 0.0210(10) 0.0263(10) -0.0021(8) -0.0005(7) 0.0002(7)
C16 0.0242(9) 0.0249(11) 0.0422(12) -0.0099(9) 0.0066(8) 0.0049(8)
C17 0.0269(9) 0.0219(10) 0.0334(11) 0.0027(8) 0.0074(8) 0.0032(7)
C18 0.0251(9) 0.0181(10) 0.0335(11) -0.0043(8) 0.0079(8) 0.0027(7)
C19 0.0338(10) 0.0257(11) 0.0378(12) -0.0009(9) 0.0144(9) -0.0035(8)
C20 0.0487(12) 0.0253(11) 0.0303(11) 0.0022(9) 0.0071(9) 0.0033(9)
C21 0.0353(11) 0.0314(12) 0.0337(12) -0.0032(9) -0.0007(9) 0.0090(9)
C22 0.0352(10) 0.0252(11) 0.0291(11) -0.0005(8) 0.0005(8) -0.0003(8)

_geom_special_details            
; 
 All esds (except the esd in the dihedral angle between two l.s. planes) 
 are estimated using the full covariance matrix.  The cell esds are taken 
 into account individually in the estimation of esds in distances, angles 
 and torsion angles; correlations between esds in cell parameters are only 
 used when they are defined by crystal symmetry.  An approximate (isotropic) 
 treatment of cell esds is used for estimating esds involving l.s. planes. 
;

loop_
_geom_bond_atom_site_label_1
_geom_bond_atom_site_label_2
_geom_bond_distance
_geom_bond_site_symmetry_2
_geom_bond_publ_flag
O1 C1 1.362(2) . ?
O1 C4 1.474(2) . ?
O2 C4 1.393(2) . ?
O2 C22 1.435(2) . ?
O3 C13 1.215(2) . ?
O4 C15 1.349(2) . ?
O4 C16 1.461(2) . ?
O5 C15 1.207(2) . ?
N1 C17 1.335(3) . ?
N1 C21 1.342(3) . ?
C1 C14 1.352(3) 3_666 ?
C1 C2 1.460(3) . ?
C2 C3 1.325(3) . ?
C3 C4 1.499(2) . ?
C4 C5 1.518(3) . ?
C5 C6 1.527(3) . ?
C6 C7 1.524(3) . ?
C7 C8 1.522(3) . ?
C8 C9 1.521(3) . ?
C9 C10 1.524(3) . ?
C10 C11 1.526(3) . ?
C11 C12 1.523(3) . ?
C12 C13 1.510(2) . ?
C13 C14 1.510(2) . ?
C14 C1 1.352(3) 3_666 ?
C14 C15 1.472(2) . ?
C16 C18 1.495(3) . ?
C17 C18 1.382(3) . ?
C18 C19 1.392(3) . ?
C19 C20 1.378(3) . ?
C20 C21 1.372(3) . ?

loop_
_geom_angle_atom_site_label_1
_geom_angle_atom_site_label_2
_geom_angle_atom_site_label_3
_geom_angle
_geom_angle_site_symmetry_1
_geom_angle_site_symmetry_3
_geom_angle_publ_flag
C1 O1 C4 109.23(13) . . ?
C4 O2 C22 115.20(14) . . ?
C15 O4 C16 115.44(14) . . ?
C17 N1 C21 116.30(17) . . ?
C14 C1 O1 118.54(16) 3_666 . ?
C14 C1 C2 132.13(16) 3_666 . ?
O1 C1 C2 109.15(15) . . ?
C3 C2 C1 107.70(16) . . ?
C2 C3 C4 111.28(16) . . ?
O2 C4 O1 108.81(14) . . ?
O2 C4 C3 115.07(15) . . ?
O1 C4 C3 102.17(13) . . ?
O2 C4 C5 107.61(14) . . ?
O1 C4 C5 108.96(14) . . ?
C3 C4 C5 113.92(16) . . ?
C4 C5 C6 113.76(16) . . ?
C7 C6 C5 112.52(17) . . ?
C6 C7 C8 112.64(18) . . ?
C9 C8 C7 114.19(18) . . ?
C8 C9 C10 112.90(18) . . ?
C9 C10 C11 113.82(17) . . ?
C12 C11 C10 111.18(16) . . ?
C13 C12 C11 114.96(16) . . ?
O3 C13 C14 121.18(16) . . ?
O3 C13 C12 123.22(16) . . ?
C14 C13 C12 115.60(15) . . ?
C1 C14 C15 121.04(16) 3_666 . ?
C1 C14 C13 118.02(15) 3_666 . ?
C15 C14 C13 120.49(16) . . ?
O5 C15 O4 122.99(16) . . ?
O5 C15 C14 126.44(17) . . ?
O4 C15 C14 110.54(15) . . ?
O4 C16 C18 112.83(16) . . ?
N1 C17 C18 125.02(19) . . ?
C17 C18 C19 117.14(18) . . ?
C17 C18 C16 120.89(18) . . ?
C19 C18 C16 121.88(17) . . ?
C20 C19 C18 118.79(18) . . ?
C21 C20 C19 119.5(2) . . ?
N1 C21 C20 123.29(19) . . ?

loop_
_geom_torsion_atom_site_label_1
_geom_torsion_atom_site_label_2
_geom_torsion_atom_site_label_3
_geom_torsion_atom_site_label_4
_geom_torsion
_geom_torsion_site_symmetry_1
_geom_torsion_site_symmetry_2
_geom_torsion_site_symmetry_3
_geom_torsion_site_symmetry_4
_geom_torsion_publ_flag
C4 O1 C1 C14 168.46(16) . . . 3_666 ?
C4 O1 C1 C2 -7.23(19) . . . . ?
C14 C1 C2 C3 -169.3(2) 3_666 . . . ?
O1 C1 C2 C3 5.6(2) . . . . ?
C1 C2 C3 C4 -1.7(2) . . . . ?
C22 O2 C4 O1 -70.30(18) . . . . ?
C22 O2 C4 C3 43.6(2) . . . . ?
C22 O2 C4 C5 171.78(15) . . . . ?
C1 O1 C4 O2 127.99(15) . . . . ?
C1 O1 C4 C3 5.89(18) . . . . ?
C1 O1 C4 C5 -114.95(16) . . . . ?
C2 C3 C4 O2 -120.12(18) . . . . ?
C2 C3 C4 O1 -2.4(2) . . . . ?
C2 C3 C4 C5 114.93(18) . . . . ?
O2 C4 C5 C6 53.6(2) . . . . ?
O1 C4 C5 C6 -64.2(2) . . . . ?
C3 C4 C5 C6 -177.54(16) . . . . ?
C4 C5 C6 C7 -179.56(17) . . . . ?
C5 C6 C7 C8 178.17(18) . . . . ?
C6 C7 C8 C9 178.92(19) . . . . ?
C7 C8 C9 C10 -179.59(19) . . . . ?
C8 C9 C10 C11 175.53(18) . . . . ?
C9 C10 C11 C12 -175.33(18) . . . . ?
C10 C11 C12 C13 172.43(16) . . . . ?
C11 C12 C13 O3 20.5(3) . . . . ?
C11 C12 C13 C14 -158.94(16) . . . . ?
O3 C13 C14 C1 -105.4(2) . . . 3_666 ?
C12 C13 C14 C1 74.0(2) . . . 3_666 ?
O3 C13 C14 C15 82.2(2) . . . . ?
C12 C13 C14 C15 -98.42(19) . . . . ?
C16 O4 C15 O5 -5.6(3) . . . . ?
C16 O4 C15 C14 172.64(15) . . . . ?
C1 C14 C15 O5 11.7(3) 3_666 . . . ?
C13 C14 C15 O5 -176.14(18) . . . . ?
C1 C14 C15 O4 -166.42(16) 3_666 . . . ?
C13 C14 C15 O4 5.7(2) . . . . ?
C15 O4 C16 C18 87.3(2) . . . . ?
C21 N1 C17 C18 0.1(3) . . . . ?
N1 C17 C18 C19 -0.7(3) . . . . ?
N1 C17 C18 C16 -177.34(18) . . . . ?
O4 C16 C18 C17 -120.92(19) . . . . ?
O4 C16 C18 C19 62.6(2) . . . . ?
C17 C18 C19 C20 0.7(3) . . . . ?
C16 C18 C19 C20 177.24(18) . . . . ?
C18 C19 C20 C21 0.0(3) . . . . ?
C17 N1 C21 C20 0.6(3) . . . . ?
C19 C20 C21 N1 -0.7(3) . . . . ?

_diffrn_measured_fraction_theta_max 0.962
_diffrn_reflns_theta_full        66.70
_diffrn_measured_fraction_theta_full 0.962
_refine_diff_density_max         0.191
_refine_diff_density_min         -0.214
_refine_diff_density_rms         0.045
